# Genome-wide association study of pain sensitivity assessed by questionnaire and the cold pressor test

Pierre Fontanillas<sup>1</sup>, Achim Kless<sup>2\*</sup>, 23andMe Research Team<sup>1</sup>, John Bothmer<sup>2</sup>, Joyce Y. Tung<sup>1\*</sup>

23andMe Research Team (Michelle Agee, Babak Alipanahi, Adam Auton, Robert K. Bell, Katarzyna Bryc, Sarah L. Elson, Pierre Fontanillas, Nicholas A. Furlotte, David A. Hinds, Naomi Iwata, Jennifer C. McCreight, Karen E. Huber, Aaron Kleinman, Nadia K. Litterman, Joanna L. Mountain, Elizabeth S. Noblin, Carrie A.M. Northover, Steven J. Pitts, J. Fah Sathirapongsasuti, Olga V. Sazonova, Anjali J. Shastri, Janie F. Shelton, Suyash Shringarpure, Chao Tian, Vladimir Vacic, Catherine Weldon, Keng-Han Lin, Yunxuan Jiang, Kimberly McManus, David Poznik, Ethan Jewett, Xin Wang, Barry Hicks)

Affiliations: <sup>1</sup>23andMe Inc., Mountain View, California, USA; <sup>2</sup>Grünenthal Innovation, Translational Science & Intelligence, Grünenthal GmbH, Aachen, Germany

This paper has been removed owing to copyright violation.
